# Supplementary material
Source: MDPI journal article supplement (https://www.mdpi.com/2073-4344/13/11/1391)
Supplement: s1 [file s1]

## Supplementary Materials

### A novel organic/inorganic dual Z-scheme photocatalyst with visible-light response for organic pollutants degradation

Taoming Yu <sup>a§</sup>, Doudou Wang <sup>a§</sup>, Lili Li <sup>a</sup>, Wenjing Song<sup>a</sup>, Xuan Pang<sup>b\*</sup>, Ce Liang <sup>a, \*</sup>

<sup>a</sup> Key Laboratory of Automobile Materials, Ministry of Education, and College of Materials Science and Engineering, Jilin University, Changchun 130022, China.

<sup>b</sup> Key Laboratory of Polymer Ecomaterials, Changchun Institute of Applied Chemistry, Chinese Academy of Sciences

\* Corresponding author.

E-mail address: liangce@jlu.edu.cn (Ce Liang).

§These two authors are joint first author.

#### Kinetic model analysis

The photodegradation kinetics study for the composite membrane were identified with the Langmuir–Hinshelwood (L–H) model and expressed as Equation (1):

$$r = -\frac{dC}{dt} = \frac{kKC}{1+KC} \quad (1)$$

where  $r$  was the degradation rate,  $C$  ( $\text{mg L}^{-1}$ ) was the concentration of RhB,  $t$  (min) was the running time of the simulated sunlight irradiation,  $k$  ( $\text{mg L}^{-1} \text{min}^{-1}$ ) was the reaction rate constant, and  $K$  ( $\text{L mg}^{-1}$ ) was the equilibrium constant. The term  $kK$  could be regarded as an apparent rate constant  $k_{app}(\text{min}^{-1})$ . Therefore, Equation (1) was expressed as Equation (2):

$$r = -\frac{dC}{dt} = \frac{k_{app}C}{1+KC} \quad (2)$$

where  $KC \ll 1$  in lower-concentration solutions of RhB. The above equation could be simplified to the first-order equation and expressed as Equation (3):

$$r = -\frac{dC}{dt} = k_{app}C \quad (4)$$

#### Treatment cost analysis

To synthesize 20 g PAN/PANI-Sb<sub>2</sub>S<sub>3</sub>-ZnO, 20 g PAN, 10 g PANI, 15.2 g SbCl<sub>3</sub>, 24 g Na<sub>2</sub>S and 500 ml of HCl were required. Electricity was required for ultrasonic, high-voltage power supply, magnetic stirring and oven. This brought the cost of 20 g PAN/PANI-Sb<sub>2</sub>S<sub>3</sub>-ZnO to 150 CNY (20.54 USD) and the rate to 7.5 CNY (1.027 USD) per gram. To treat the 10,000 L of RhB (12 mg/L), 33.4 g PAN/PANI-Sb<sub>2</sub>S<sub>3</sub>-ZnO were required. Electricity was required for UV light and magnetic stirring of the solution. The cost of treatment of 10,000 L of RhB was 250 CNY (34.23 USD).

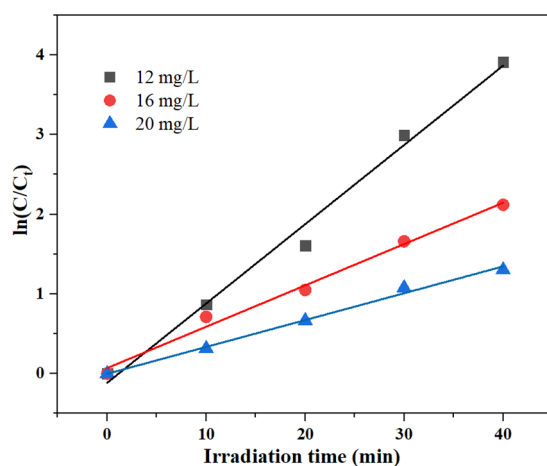

**Figure S1** Corresponding reaction rate diagram of RhB with different initial concentrations by PAN/PANI-Sb<sub>2</sub>S<sub>3</sub>-ZnO.

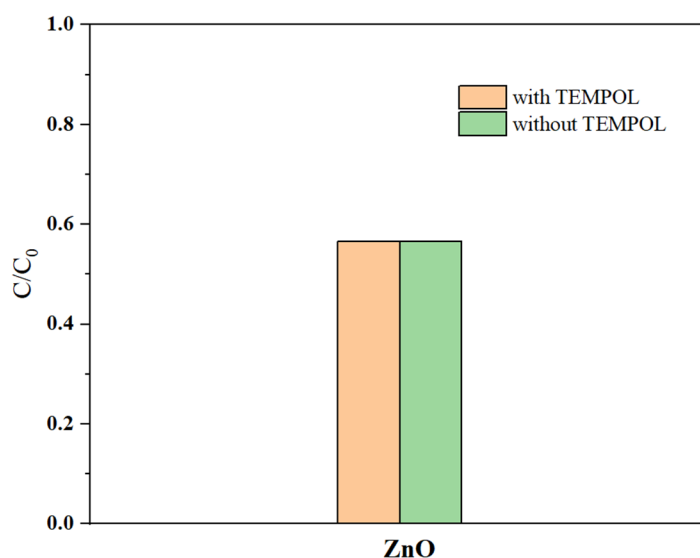

**Figure S2** The degradation of RhB by ZnO with or without TEMPOL. [Experimental conditions: Initial concentration = 12 mg/L, photocatalyst = 0.2 g, TEMPOL concentration=10Mm, pH value for RhB solutions = 10, t = 40 min, UV light irradiation]

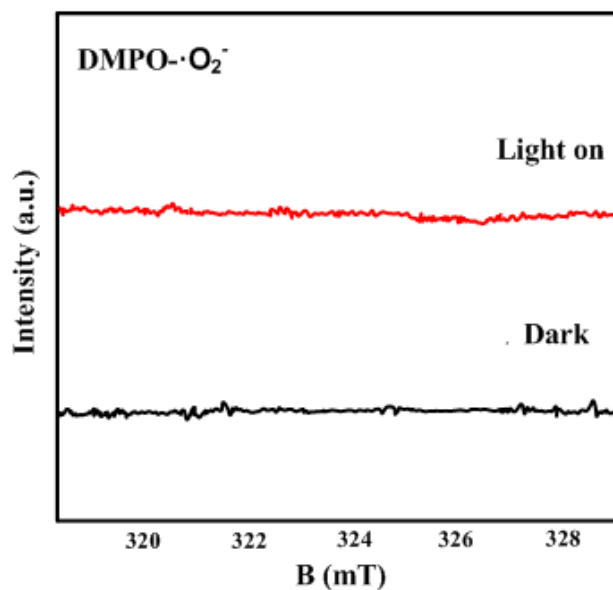

**Figure S3** ESR spectra of radical adducts trapped by DMPO in ZnO for superoxide radical.

**Table S1** The pseudo-first order kinetic model kinetic parameters of RhB photocatalytic experiments.

| Photocatalyst                                | $k_{app}$ ( $10^{-3} \text{ min}^{-1}$ ) | $t_{1/2}$ (min) | $R^2$ |
|----------------------------------------------|------------------------------------------|-----------------|-------|
| PAN/PANI                                     | 32.3                                     | 21.4            | 0.99  |
| PAN/PANI-Sb <sub>2</sub> S <sub>3</sub>      | 42.9                                     | 16.1            | 0.998 |
| PAN/PANI-Sb <sub>2</sub> S <sub>3</sub> -ZnO | 59.8                                     | 11.6            | 0.997 |

**Table S2** The pseudo-first order kinetic model kinetic parameters of RhB, MB, CR and MO photocatalytic experiments by PAN/PANI-Sb<sub>2</sub>S<sub>3</sub>-ZnO.

| dyes | $k_{app}$ ( $10^{-3} \text{ min}^{-1}$ ) | $t_{1/2}$ (min) | $R^2$ |
|------|------------------------------------------|-----------------|-------|
| RhB  | 59.8                                     | 11.6            | 0.997 |
| MB   | 45.1                                     | 15.3            | 0.988 |
| CR   | 38.4                                     | 18.1            | 0.992 |
| MO   | 36.7                                     | 18.9            | 0.994 |

**Table S3** Comparison of degradation rate of PAN/PANI-Sb<sub>2</sub>S<sub>3</sub>-ZnO with other photocatalysts toward RhB and MB.

| Photocatalyst                                        | Pollutants | degradation rate | Ref.      |
|------------------------------------------------------|------------|------------------|-----------|
| AgInS <sub>2</sub> /CN/PAN                           | RhB        | 94.48%           | [1]       |
| P <sub>2</sub> Mo <sub>5</sub>                       | RhB        | 89.57%           | [2]       |
| TiO <sub>2</sub> /BP/g-C <sub>3</sub> N <sub>4</sub> | RhB        | 87.39%           | [3]       |
| In <sub>2</sub> O <sub>3</sub> /SnO <sub>2</sub>     | MB         | 50.9%            | [4]       |
| Eu:GO/KSrPO <sub>4</sub>                             | MB         | 82.75%           | [5]       |
| MDTS                                                 | MB         | 83%              | [6]       |
| PAN/PANI-Sb <sub>2</sub> S <sub>3</sub> -ZnO         | RhB        | 99.2%            | This work |
|                                                      | MB         | 96.42%           |           |

**Table S4** L-H model kinetic parameters for different initial concentrations of RhB by PAN/PANI-Sb<sub>2</sub>S<sub>3</sub>-ZnO.

| Photocatalyst                                | initial concentrations of RhB | $k_{app}(\text{min}^{-1})$ | $R^2$ |
|----------------------------------------------|-------------------------------|----------------------------|-------|
| PAN/PANI-Sb <sub>2</sub> S <sub>3</sub> -ZnO | 12 mg/L                       | 0.0995                     | 0.986 |
|                                              | 16 mg/L                       | 0.0518                     | 0.987 |
|                                              | 20 mg/L                       | 0.0337                     | 0.991 |
